# Supplementary material for: Synthesis of cis-hydrindan-2,4-diones bearing an all-carbon quaternary center by a Danheiser annulation
Source: publisher site journal article supplement (doi:10.3762/bjoc.14.237), 2018-10-09

**Supporting Information**  
**for**  
**Synthesis of *cis*-hydrindan-2,4-diones bearing an *all*-carbon**  
**quaternary center by a Danheiser annulation**

Gisela V. Saborit<sup>1</sup>, Carlos Cativiela<sup>2</sup>, Ana I. Jiménez<sup>2</sup>, Josep Bonjoch\*<sup>1</sup> and Ben Bradshaw\*<sup>1</sup>

Address: <sup>1</sup>Laboratori de Química Orgànica, Facultat de Farmàcia, IBUB,  
Universitat de Barcelona, Av. Joan XXIII s/n, 08028-Barcelona, Spain and

<sup>2</sup>Departamento de Química Orgánica Instituto de Síntesis Química y Catálisis  
Homogénea (ISQCH), CSIC-Universidad de Zaragoza, 50009 Zaragoza, Spain

Email address: Josep Bonjoch\* - [josep.bonjoch@ub.edu](mailto:josep.bonjoch@ub.edu); Ben Bradshaw\* -  
[benbradshaw@ub.edu](mailto:benbradshaw@ub.edu)

\*Corresponding author

Experimental procedures and copies of <sup>1</sup>H and <sup>13</sup>C NMR spectra  
of all compounds.

**Table of contents**

|                                                                           |    |
|---------------------------------------------------------------------------|----|
| Experimental .....                                                        | S2 |
| <sup>1</sup> H and <sup>13</sup> C NMR data of compounds <b>4–8</b> ..... | S6 |

**General.** All reactions were carried out under an argon atmosphere with dry, freshly distilled solvents under anhydrous conditions. All product mixtures were analyzed by thin-layer chromatography using TLC silica gel plates with a fluorescent indicator ( $\lambda = 254$  nm). Analytical thin-layer chromatography was performed on SiO<sub>2</sub> (Merck silica gel 60 F<sub>254</sub>), and the spots were located by UV light or/and a 1% KMnO<sub>4</sub> aqueous solution. Chromatography refers to flash chromatography and was carried out on SiO<sub>2</sub> (silica gel 60 ACC, 230–240 mesh). Drying of organic extracts during the reaction workup was performed over anhydrous Na<sub>2</sub>SO<sub>4</sub>. Chemical shifts of <sup>1</sup>H and <sup>13</sup>C NMR spectra are reported in ppm downfield ( $\delta$ ) from Me<sub>4</sub>Si. All NMR data assignments are supported by gCOSY and gHSQC experiments.

**5-Methyl-2-{3-[*N*-benzyl-*N*-(4-methylphenylsulfonyl)]aminopropyl}cyclohex-2-enone (**4**).**

**Method A:** Decahydroquinoline **1** (5.0 g) was prepared from  $\beta$ -ketoester **2** in 79% yield on a 15 mmol scale, following our previously reported procedure.<sup>1</sup> Compound **1** (2.0 g, 4.75 mmol) was treated with TFA (3.3 mL) for 15 min at room temperature, the solvent was removed, and the last traces of TFA were removed by azeotroping with toluene (2  $\times$  10 mL). The reaction flask was maintained on the rotatory evaporator in vacuo at 70 °C for 3 h. To a solution of the resulting ketone in THF (21 mL) were added successively LiOH (568 mg, 23.74 mmol, 5.0 equiv), KI (2.36 g, 14.24 mmol, 3.0 equiv) and benzyl bromide (1.7 mL, 14.24 mmol, 3.0 equiv), and the mixture was stirred at reflux temperature overnight. The mixture was allowed to reach room temperature, filtered through a pad of celite in vacuo and the filter cake was thoroughly washed with CH<sub>2</sub>Cl<sub>2</sub>. Volatiles were removed and the residue was purified by chromatography (2.5–10% EtOAc/hexane) to give cyclohexenone **4** (1.7 g, 86%, 68% overall yield from the starting material **2**);  $R_f = 0.42$  (25% EtOAc/hexanes). <sup>1</sup>H NMR (CDCl<sub>3</sub>, 400 MHz)  $\delta$  1.00 (d,  $J = 6.2$  Hz, 3H, CH<sub>3</sub>), 1.46 (quint,  $J = 7.7$  Hz, 2H, H-2'), 1.90-2.06 (m, 4H, H-4, H-6, H-1'), 2.27-2.43

<sup>1</sup> Bradshaw, B.; Luque-Corredera, C.; Bonjoch, J. *Org. Lett.* **2013**, *15*, 326–329.

(m, 5H, H-4, H-6, ArCH<sub>3</sub>), 3.03 (m, 2H, H-3'), 4.30 (CH<sub>2</sub>Ph), 6.46 (m, 1H, H-3), 7.28 (m, 7H, *o*-Ts, Ph), 7.71 (d, *J* = 8.3 Hz, 2H, *m*-Ts); <sup>13</sup>C NMR (CDCl<sub>3</sub>, 100 MHz) δ 21.2 (CH<sub>3</sub>), 21.6 (ArCH<sub>3</sub>), 26.5 (C-5), 26.7 (C-2'), 30.6 (C-1'), 34.4 (C-4), 46.6 (C-6), 47.6 (C-3'), 51.9 (CH<sub>2</sub>Ph), 127.3 (*o*-Ts), 127.8 (*p*-Bn), 128.6 (*o*-Bn), 129.8 (*m*-Ts), 136.6 (*ipso*-Bn), 137.0 (*p*-Ts), 138.2 (*ipso*-Ts), 143.3 (C-2), 145.1 (C-3), 199.5 (C-1). HRMS (ESI-TOF) *m/z*: [M + H]<sup>+</sup> Calcd for C<sub>24</sub>H<sub>30</sub>NO<sub>3</sub>S 412.1941, found 412.1938.

**Method B (one-pot procedure):** To a cooled (0 °C) solution of keto ester **2** (1.05 g, 2.84 mmol, 1.0 equiv) in iPrOH (10 mL) and H<sub>2</sub>O (0.5 mL, 28.4 mmol, 10 equiv) was added crotonaldehyde (0.26 mL, 3.13 mmol, 1.1 equiv) followed by LiOH·H<sub>2</sub>O (119 mg, 2.84 mmol, 1 equiv). The reaction mixture was allowed to reach room temperature and stirred for 24 h. To this flask was added the resin (PS) of *p*-toluenesulfonic acid (4.3 g, 30–60 mesh, Aldrich) and the mixture was stirred for 2 h. After filtration and concentration the crude toluenesulfonamide **3** was processed as in Method A to give **4** (674 mg, 56% from **2**).

**(1*RS*,4*SR*,6*RS*)-1-[*N*-Benzyl-*N*-(4-methylphenylsulfonyl)-3-aminopropyl]-4,9-dimethyl-8 trimethylsilylbicyclo[4.3.0]non-8-en-2-one (**5**).** To a cooled (–78 °C) solution of **4** (471 mg, 1.14 mmol) and 1-methyl-1-(trimethylsilyl)allene (0.32 mL, 1.94 mmol) in CH<sub>2</sub>Cl<sub>2</sub> (6 mL), TiCl<sub>4</sub> (0.21 mL, 1.7 mmol) was added dropwise. The resulting dark red solution was stirred at that temperature for 1 h and then transferred to a mixture of water (25 mL) and diethyl ether (25 mL). The aqueous layer was extracted with diethyl ether (3 × 25 mL) and the combined organic layers were washed with brine (25 mL), dried, and concentrated. The crude product was purified by chromatography (2.5–10% EtOAc/hexane) to give **5** (385 mg, 63%), followed by **6** (78 mg, 15%), as an epimeric mixture.

Compound **5**: *R*<sub>f</sub> = 0.54 (25% EtOAc/hexanes); <sup>1</sup>H NMR (CDCl<sub>3</sub>, 400 MHz) δ 0.09 (s, 9H, (CH<sub>3</sub>)<sub>3</sub>Si), 0.85 (d, *J* = 6.8 Hz, 3H, CH<sub>3</sub>), 1.15–1.25 (m, 4H, H-5eq, H-1', 2H-2'), 1.39 (td, *J* = 12.4, 3.3 Hz, 1H, H-5ax), 1.44 (t, *J* = 2.1 Hz, 3H, 9-CH<sub>3</sub>), 1.50 (dm, *J* = 13.6 Hz, 1H, H-1'), 1.77 (dd, *J* = 16.0, 8.5 Hz, 1H, H-3ax), 1.99–2.05 (m, 2H, H-4, H-7), 2.11 (dddd, *J* = 10, 5, 5, 5 Hz, 1H, H-6), 2.27 (ddd, *J* = 16.0, 5.6, 1.4 Hz, 1H, H-3eq), 2.43 (s, 3H, ArCH<sub>3</sub>), 2.44 (ddq, *J* = 11.0, 5.5, 2.1

Hz, 1H, H-7), 3.06 (t,  $J = 7.4$  Hz, 2H, H-3'), 4.30 (2d,  $J = 14.8$  Hz, 2H, CH<sub>2</sub>Ph), 7.30-7.35 (m, 7H, *o*-Ts, Ph), 7.73 (d,  $J = 8.3$  Hz, 2H, *m*-Ts); <sup>13</sup>C NMR (CDCl<sub>3</sub>, 100 MHz)  $\delta$  -0.6 ((CH<sub>3</sub>)<sub>3</sub>Si), 14.0 (9-CH<sub>3</sub>), 21.6 (CH<sub>3</sub>), 21.6 (ArCH<sub>3</sub>), 23.4 (C-2'), 26.9 (C-4), 31.0 (C-5), 37.0 (C-1'), 41.6 (C-6), 43.5 (C-7), 47.3 (C-3), 49.0 (C-3'), 52.4 (NCH<sub>2</sub>Ar), 69.7 (C-1), 127.3 (*o*-Ts), 127.8 (Ph), 128.4 (Ph), 128.7 (Ph), 129.8 (*m*-Ts), 136.8 (*ipso*-Ph), 137.1 (*p*-Ts), 138.7 (*ipso*-Ts), 143.3 (C-8), 148.8 (C-9), 214.7 (C-2). HRMS (ESI-TOF)  $m/z$ : [M + H]<sup>+</sup> Calcd for C<sub>31</sub>H<sub>44</sub>NO<sub>3</sub>SSi 538.2806, found 538.2798.

Data for 3-(2-butynyl)-5-methyl-2-[(*N*-benzyl-*N*-(4-methylphenylsulfonyl)-3-aminopropyl]cyclohexanone (**6**):  $R_f = 0.39$  (25% EtOAc/hexanes); <sup>1</sup>H NMR (CDCl<sub>3</sub>, 400 MHz, major isomer)  $\delta$  0.99 (d,  $J = 6.8$  Hz, 5-CH<sub>3</sub>), 1.14-1.54 (m, 4H, H-1' 2H-2', H-4), 1.63 (2dd,  $J = 11.0, 2.6$  Hz, 1H, H-1'), 1.75 (t,  $J = 2.4$  Hz, CH<sub>3</sub>), 1.93 (m, 1H, H-1''), 2.07 (m, 3H, H-1', H-4, H-5), 2.26 (m, 2H, H-3, H-6, H-2), 2.43 (s, ArCH<sub>3</sub>), 3.06 (m, 2H, H-3'), 4.23 (s, 2H, CH<sub>2</sub>Ph), 7.29 (m, 5H, Ph, *m*-Ts), 7.71 (d,  $J = 8.0$  Hz, 2H *o*-Ts). <sup>13</sup>C NMR (CDCl<sub>3</sub>, 100 MHz)  $\delta$  3.6 (CH<sub>3</sub>), 18.0 (C-1''), 21.6 (CH<sub>3</sub>Ts), 22.4 (5-CH<sub>3</sub>), 23.2 (C-1'), 26.1 (C-2'), 29.8 (C-5), 38.7 (C-4), 40.2 (C-3), 47.6 (C-3'), 50.2 (C-6), 51.4 (NCH<sub>2</sub>Ar), 52.6 (C-2), 76.5 (C-3''), 77.8 (C-2''), 127.3 (*o*-Ts), 127.8 (*p*-Bn), 128.5 (*m*-Bn), 128.6 (*o*-Bn), 129.8 (*m*-Ts), 136.6 (*ipso*-Bn), 136.7 (*p*-Ts), 137.1 (*ipso*-Ts), 143.3 (*p*-Ts), 211.8 (C-1). HRMS (ESI-TOF)  $m/z$ : [M + H]<sup>+</sup> Calcd for C<sub>28</sub>H<sub>36</sub>NO<sub>3</sub>S 466.2410, found 466.2415.

**(1*RS*,4*SR*,6*RS*,9*SR*)-1-[*N*-Benzyl-*N*-(4-methylphenylsulfonyl)-3-aminopropyl]-4,9-dimethylbicyclo[4.3.0]non-2,8-dione (**8**).** To a solution of **5** (30 mg, 0.056 mmol) in CH<sub>2</sub>Cl<sub>2</sub> (1 mL) was added NaHCO<sub>3</sub> (9 mg, 0.112 mmol) followed by *m*-CPBA (12 mg, 0.053 mmol) at 0 °C. After stirring for 1 h at 0 °C, 2-methyl-2-butene (0.12 mL) was added to quench the remaining traces of *m*-CPBA and the mixture was allowed to stir for 10 min at 0 °C. Filtration and concentration afforded a 3:1 mixture of diastereomeric epoxy silanes **7**, which was directly used in the following step without any further purification. An analytical sample of **7** was obtained by chromatography (5–25% EtOAc in hexanes): <sup>1</sup>H NMR (CDCl<sub>3</sub>, 400 MHz)  $\delta$  0.08 (s, 9H, (CH<sub>3</sub>)<sub>3</sub>Si), 0.95 (d,  $J = 6.4$  Hz, 3H, CH<sub>3</sub>), 1.24 (m, 2H, H-1', H-5), 1.35 (s, 3H, 9-CH<sub>3</sub>), 1.38-1.67 (m, 6H,

2H-2', 2H-7, H-5, H-1'), 1.84 (m, 2H, H-4, H-6), 1.95 (m, 2H, H-3), 3.06 (m, 2H, H-3'), 4.25 and 4.33 (2d,  $J = 14.8$  Hz, 1H each, CH<sub>2</sub>Ph), 7.32 (m, 7H, *o*-Ts, Ph), 7.73 (d, 2H,  $J = 8.0$  Hz, *m*-Ts); <sup>13</sup>C NMR (CDCl<sub>3</sub>, 100 MHz)  $\delta$  -2.3 ((CH<sub>3</sub>)<sub>3</sub>Si), 16.2 (9-CH<sub>3</sub>), 21.6 (ArCH<sub>3</sub>), 22.4 (CH<sub>3</sub>), 23.0 (C-2'), 28.0 (C-7), 31.4 (C-6), 31.6 (C-5), 33.3 (C-1'), 37.1 (C-4), 47.9 (C-3), 48.9 (C-3'), 52.4 (CH<sub>2</sub>Ph), 59.5 (C-1), 61.4 (C-9), 69.3 (C-8), 127.3 (*o*-Ts), 127.9 (*p*-Bn), 128.7 (*m*-Bn), 128.8 (*o*-Bn), 129.9 (*m*-Ts), 136.5 (*ipso*-Bn), 137.0 (*p*-Ts), 143.4 (*ipso*-Ts), 214.7 (C-2), 217.8 (C-9). HRMS (ESI-TOF)  $m/z$ : [M + H]<sup>+</sup> Calcd for C<sub>31</sub>H<sub>44</sub>NO<sub>4</sub>SSi 554.2755, found 554.2744.

A solution of the crude epoxide **7** in formic acid (1.0 mL) was heated at reflux for 1 h, cooled, concentrated, and purified by chromatography (2.5–10% EtOAc in hexanes) to afford diketone **8** as a 3.5:1 mixture of diastereomers (15 mg, 55% yield, over 2 steps). Data for the major diastereomer:  $R_f = 0.23$  (50% EtOAc/hexanes); <sup>1</sup>H NMR (CDCl<sub>3</sub>, 400 MHz)  $\delta$  0.75 (d,  $J = 7.6$  Hz, 3H, 9-CH<sub>3</sub>), 0.97 (d,  $J = 6.4$  Hz, 3H, 4-CH<sub>3</sub>), 0.99 (m, 1H, H-2'), 1.04 (dd,  $J = 6.8, 4.0$  Hz, 1H, H-2'), 1.36 (m, 2H, H-1'), 1.63-1.71 (m, 2H, H-5), 1.91-2.01 (m, 2H, H-7eq, H-3ax), 2.11 (m, 1H, H-4), 2.17 (m, 1H, H-7ax), 2.29 (dd,  $J = 13.6, 4.0$  Hz, 2H, H-3eq), 2.45 (masked, 1H, H-6), 2.77 (q,  $J = 7.6$  Hz, 1H, H-9), 2.97 (m, 1H, H-3'), 3.09 (q,  $J = 7.2$  Hz, 1H, H-3'), 4.12-4.33 (2d,  $J = 14.8$  Hz, 2H, CH<sub>2</sub>Ph), 7.30-7.35 (m, 6H, *m*-Ts, Ph), 7.73 (d,  $J = 8.3$  Hz, 2H, *o*-Ts); <sup>13</sup>C NMR (CDCl<sub>3</sub>, 100 MHz)  $\delta$  9.9 (9-CH<sub>3</sub>), 21.1 (4-CH<sub>3</sub>), 21.7 (CH<sub>3</sub>Ar), 23.8 (C-2'), 28.0 (C-1'), 29.9 (C-4), 32.5 (C-5), 38.6 (C-6), 40.7 (C-7), 45.5 (C-3), 46.5 (C-9), 49.0 (C-3'), 53.0 (NCH<sub>2</sub>Ar), 58.1 (C-1), 127.3 (*o*-Ts), 128.2 (Ph), 128.7 (Ph), 128.8 (Ph), 129.9 (*m*-Ts), 136.5 (*ipso*-Ph), 136.6 (*p*-Ts), 143.6 (*ipso*-Ts), 212.6 (C-8), 217.8 (C-2). HRMS (ESI-TOF)  $m/z$ : [M + H]<sup>+</sup> Calcd for C<sub>28</sub>H<sub>36</sub>NO<sub>4</sub>S 482.2360, found 482.2359.

V400A\_28062013\_gsv284F19\_21-H1  
H1 / Mercury-400F  
cdcl3 / Temp: Ambient / N.Reg: XXXXXXXXX  
Usuari: san / Mostra: gsv284F19\_21  
Nom: GISELA SABORIT VILLARROYA  
Data: 27/06/13 / Ope.: G.SABORIT  
Experiment: s2pul

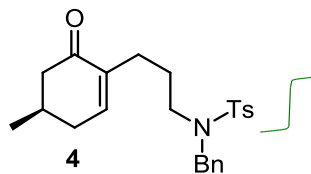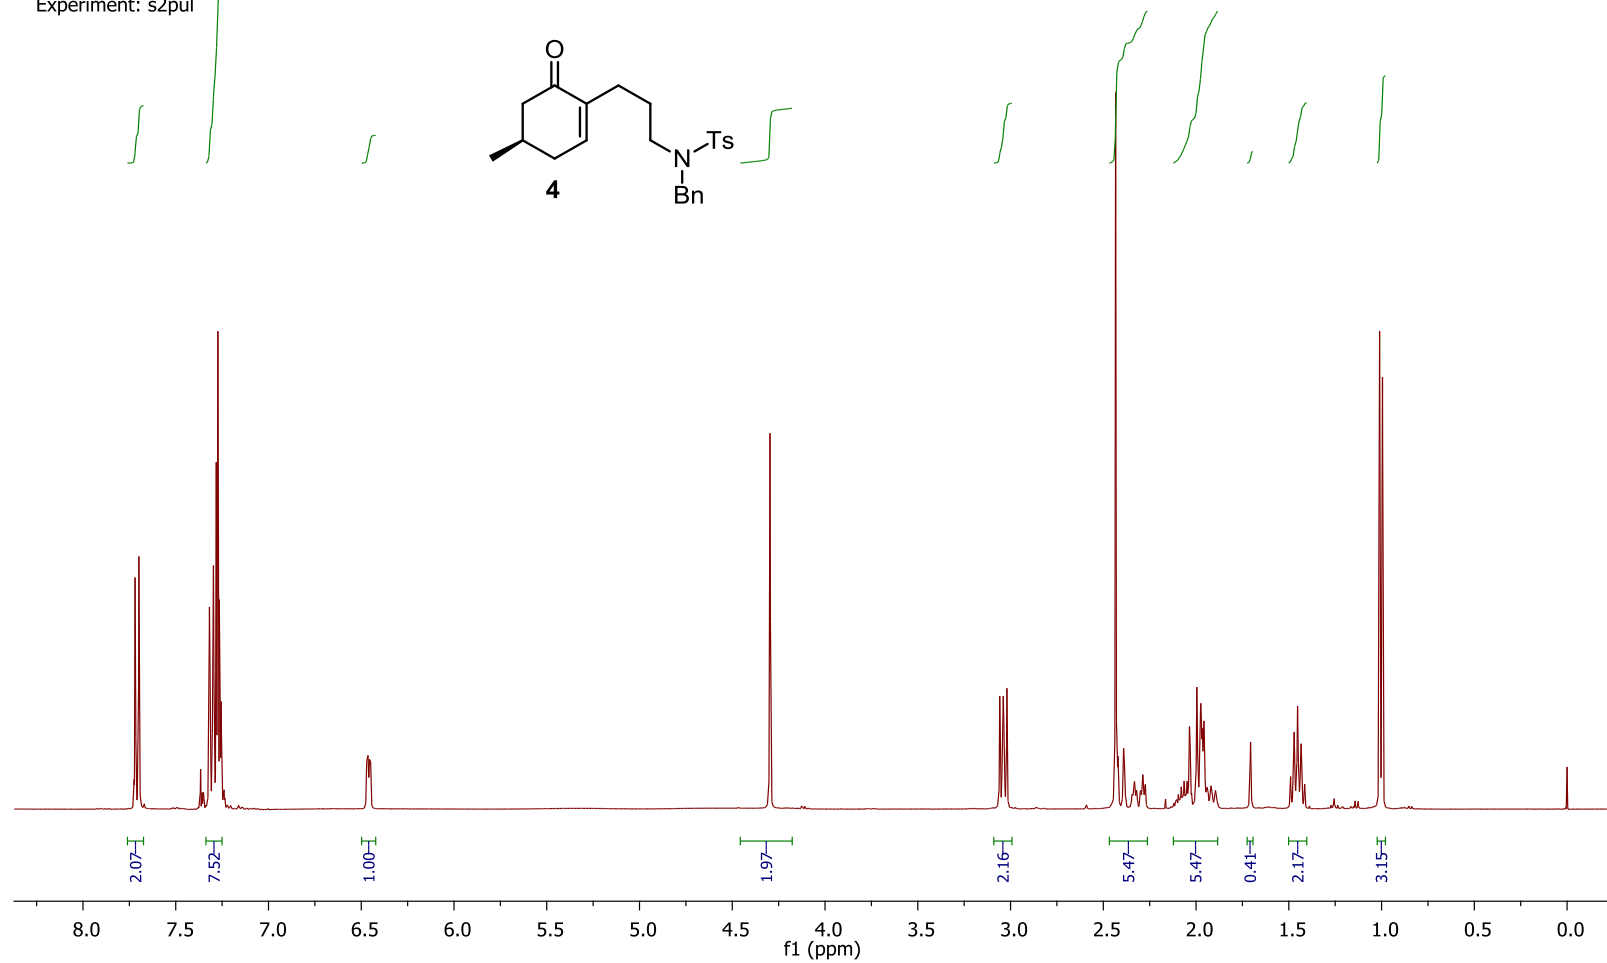

V400A\_28062013\_gsv284F19\_21-C13  
H1 / Mercury-400F  
cdcl3 / Temp: Ambient / N.Reg: XXXXXXXXX  
Usuari: san / Mostra: gsv284F19\_21  
Nom: GISELA SABORIT VILLARROYA  
Data: 27/06/13 / Ope.: G.SABORIT  
Experiment: s2pul

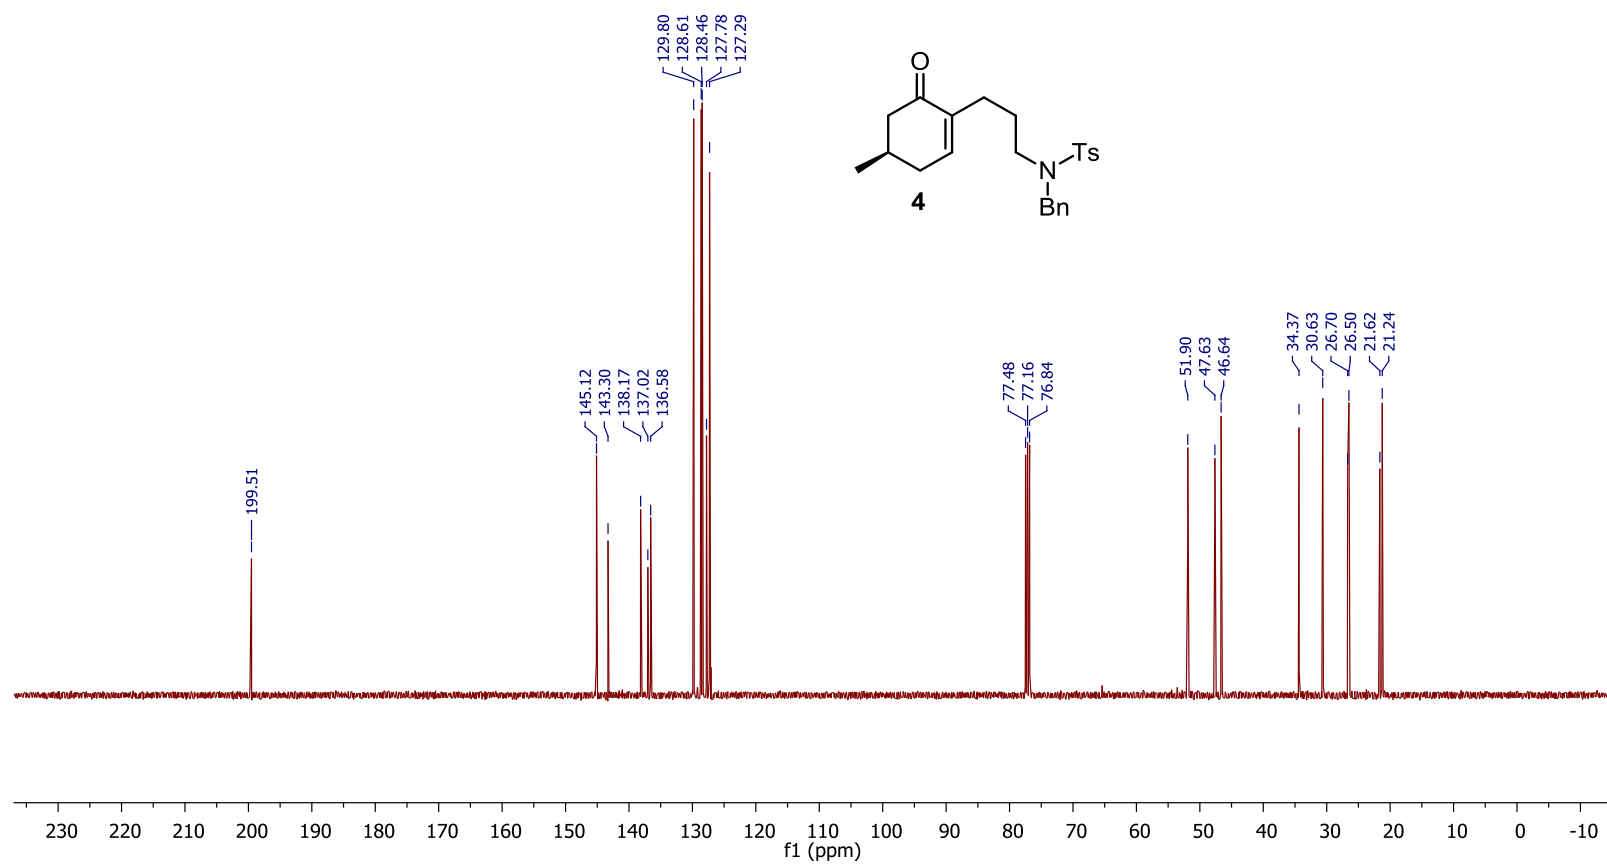

V400A\_02072013\_gsv288F2\_3-H1  
H1 / Mercury-400F  
cdcl3 / Temp: 25C / N.Reg: XXXXXXXXXXXX  
Usuari: san / Mostra: gsv288F2\_3  
Nom: GISELA SABORIT VILLARROYA  
Data: 01/07/13 / Op.: G.SABORIT  
Experiment: s2pul

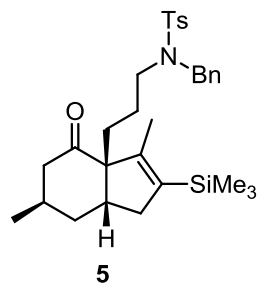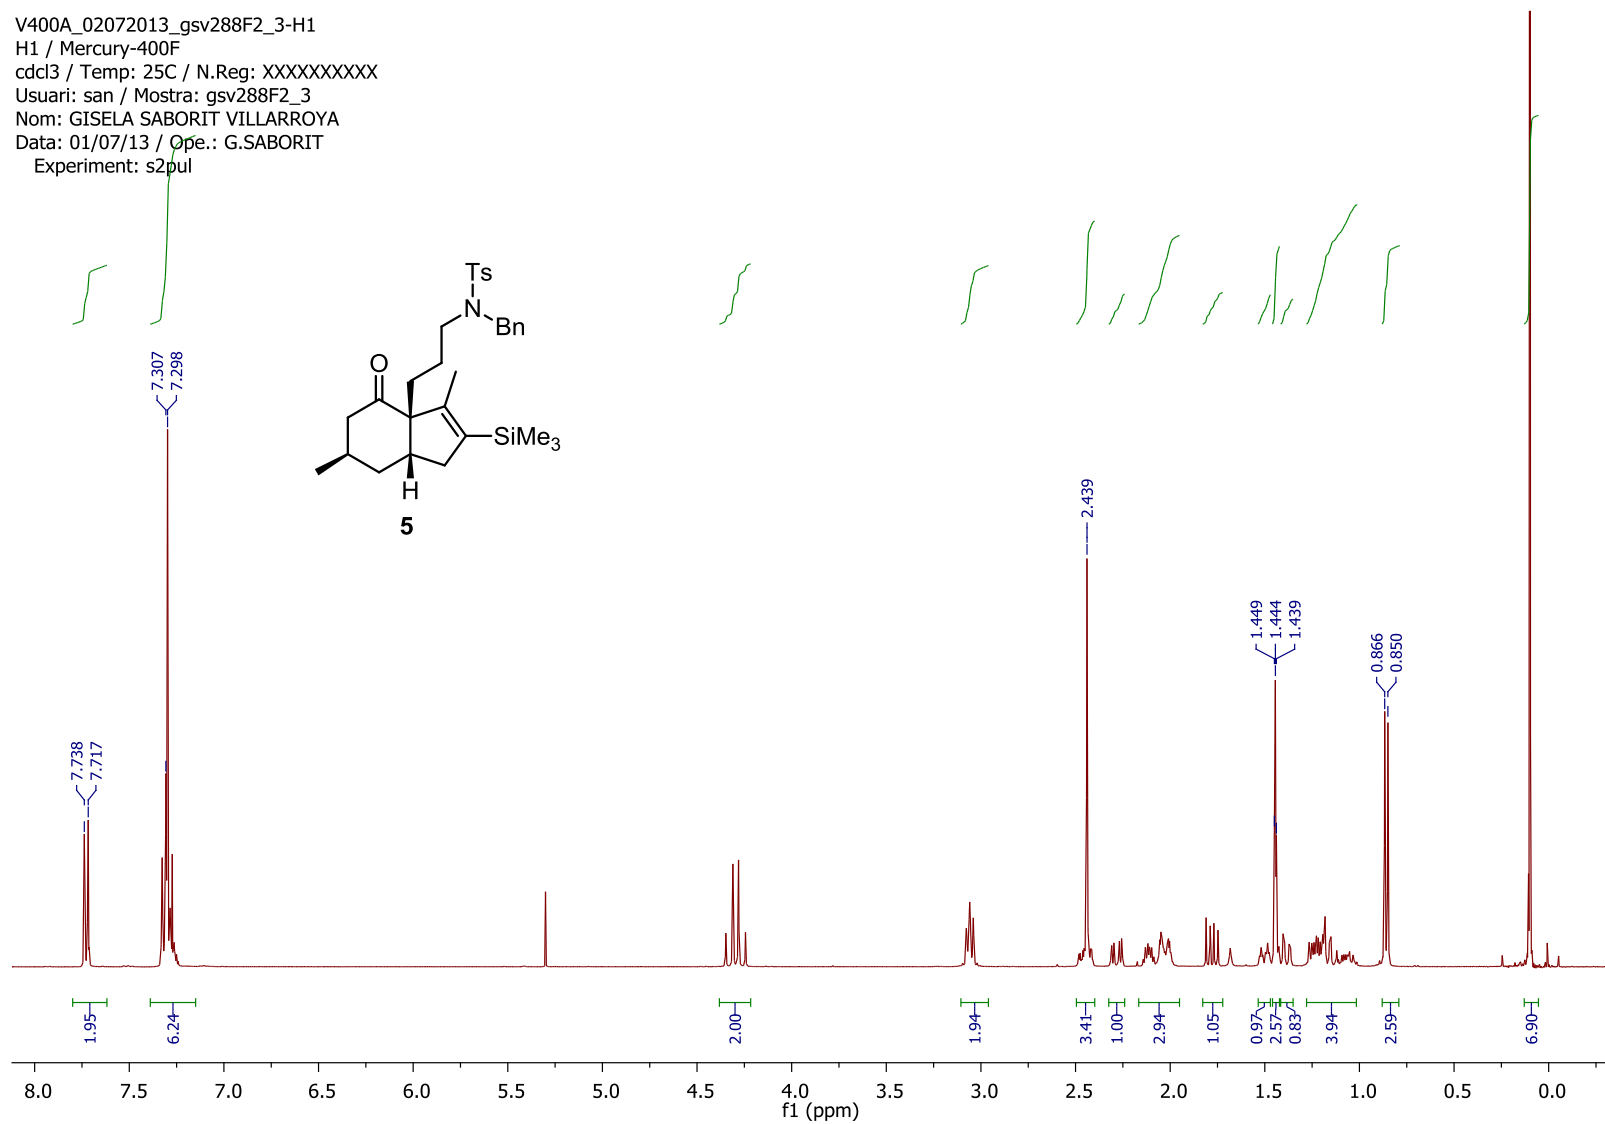



V400A\_02072013\_gsv288F2\_3-C13  
H1 / Mercury-400F  
cdcl3 / Temp: 25C / N.Reg: XXXXXXXXXX  
Usuari: san / Mostra: gsv288F2\_3  
Nom: GISELA SABORIT VILLARROYA  
Data: 01/07/13 / Ope.: G.SABORIT  
Experiment: s2pul

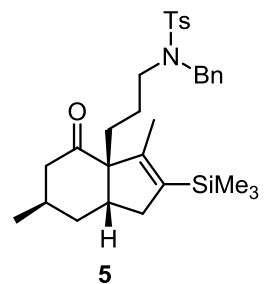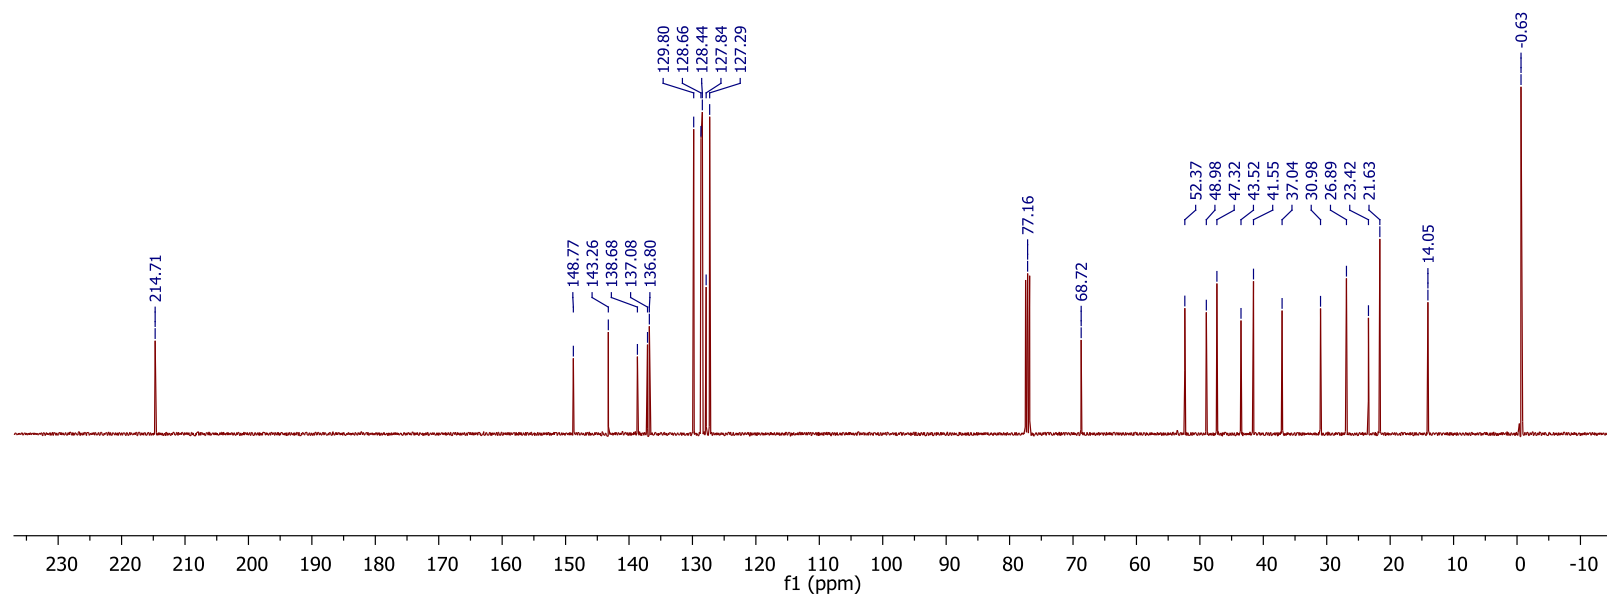

V400A\_03072013\_gsv288F5\_9-H1  
H1 / Mercury-400F  
cdcl3 / Temp: 25C / N.Reg: XXXXXXXXXX  
Usuari: san / Mostra: gsv288F5\_9  
Nom: GISELA SABORIT VILLARROYA  
Data: 03/07/13 / Ope.: G.SABORIT  
Experiment: s2pul

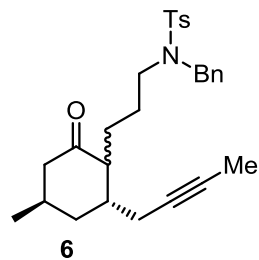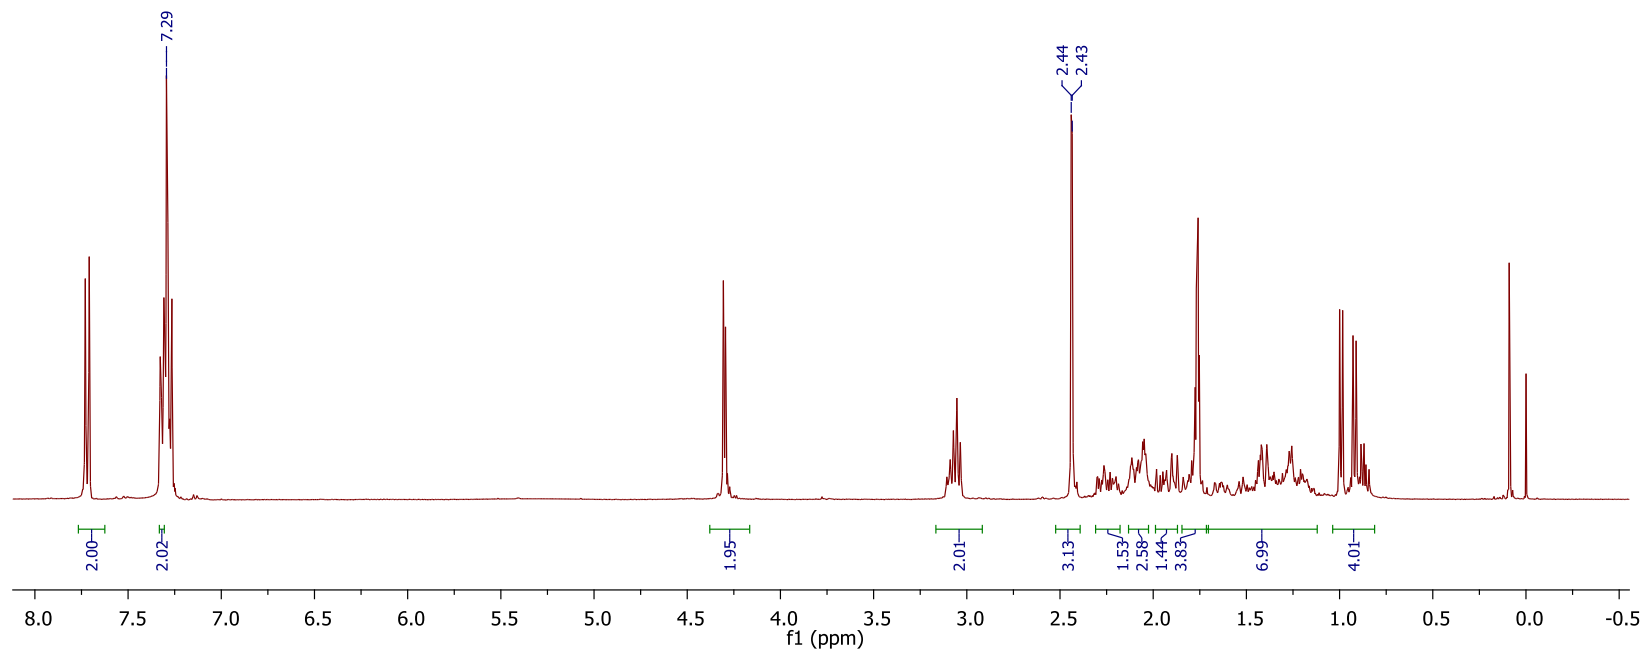

V400A\_03072013\_gsv288F5\_9-C13  
H1 / Mercury-400F  
cdcl3 / Temp: 25C / N.Reg: XXXXXXXXXX  
Usuari: san / Mostra: gsv288F5\_9  
Nom: GISELA SABORIT VILLARROYA  
Data: 03/07/13 / Ope.: G.SABORIT  
Experiment: s2pul

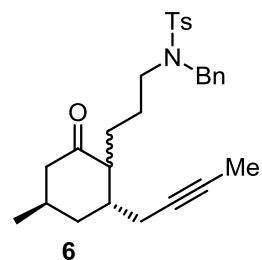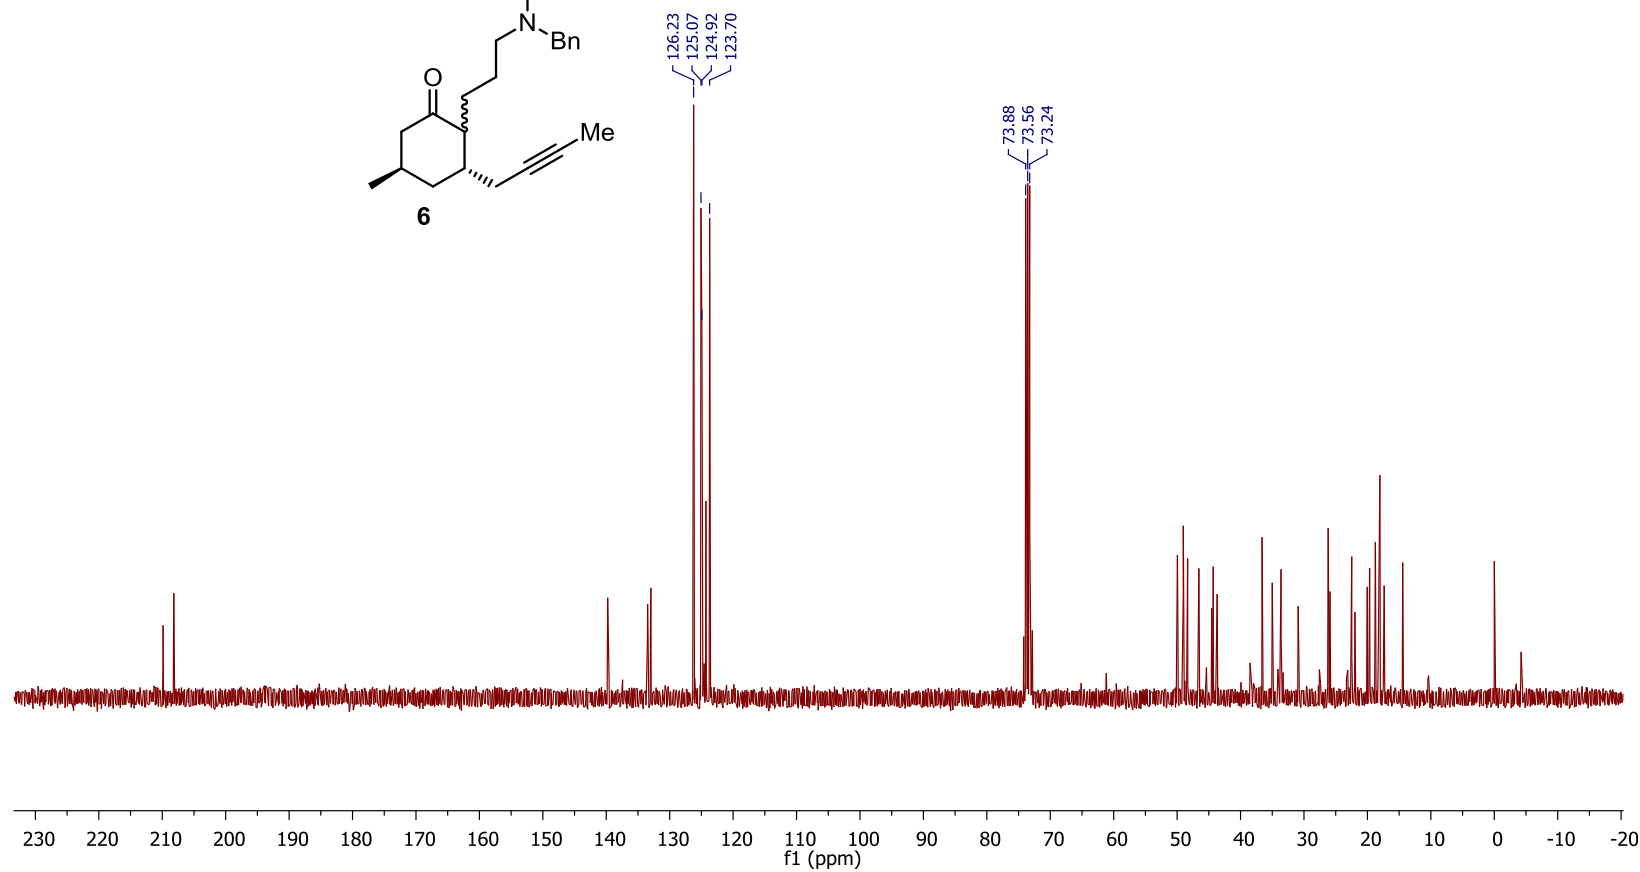

M400AFF\_10092015\_gsv621F12\_18-H1  
M400F / Num.Inv. 1009191  
cdcl3 / Temp: 25C / N.Reg: XXXXXXXXX  
Usuari: san / Mostra: gsv621F12\_18  
Nom: GISELA SABORIT VILLARROYA  
Data: 10/09/15 / Ope.: G.SABORIT

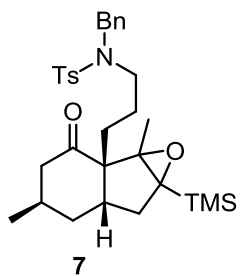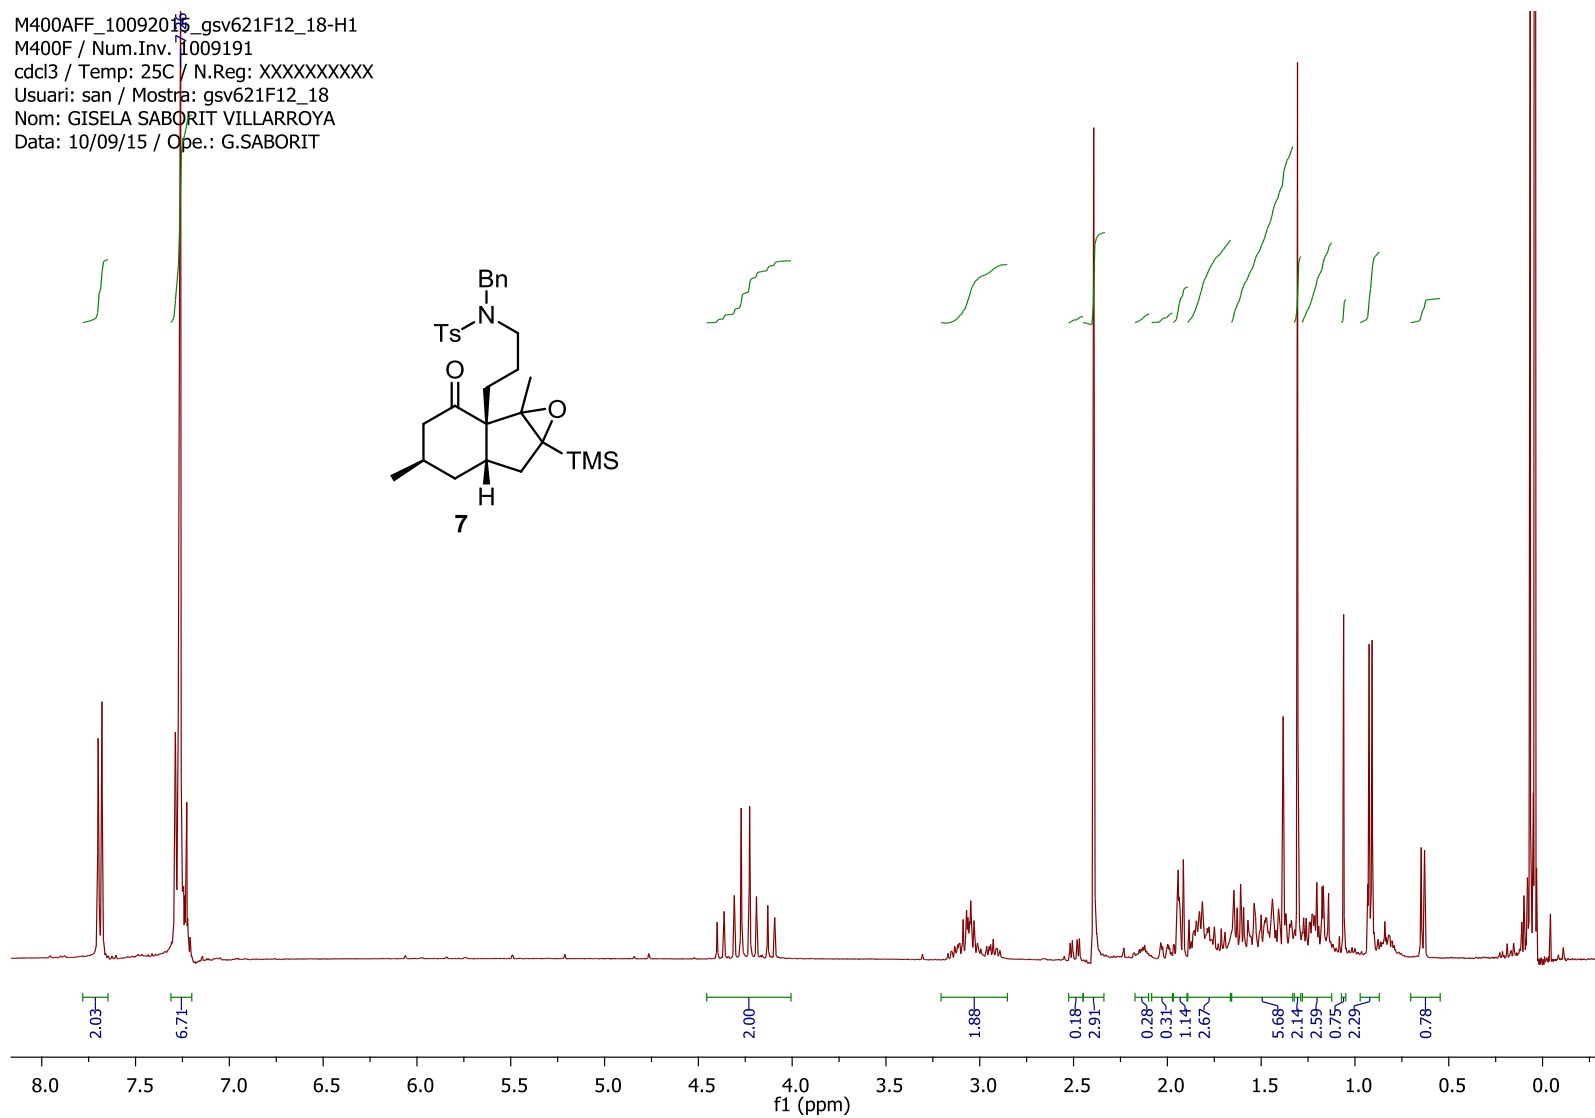

V400A\_19052014\_gsv413\_carboni-C13  
H1 / 400  
cdcl3 / Temp: Ambient / N.Reg: XXXXXXXXXX  
Usuari: san / Mostra: gsv413\_carboni  
Nom: GISELA SABORIT VILLARROYA  
Data: 19/05/14 / Ope.: G.SABORIT  
Experiment: s2pul

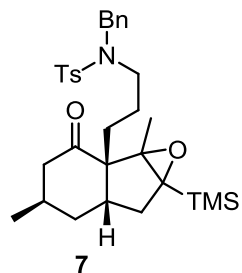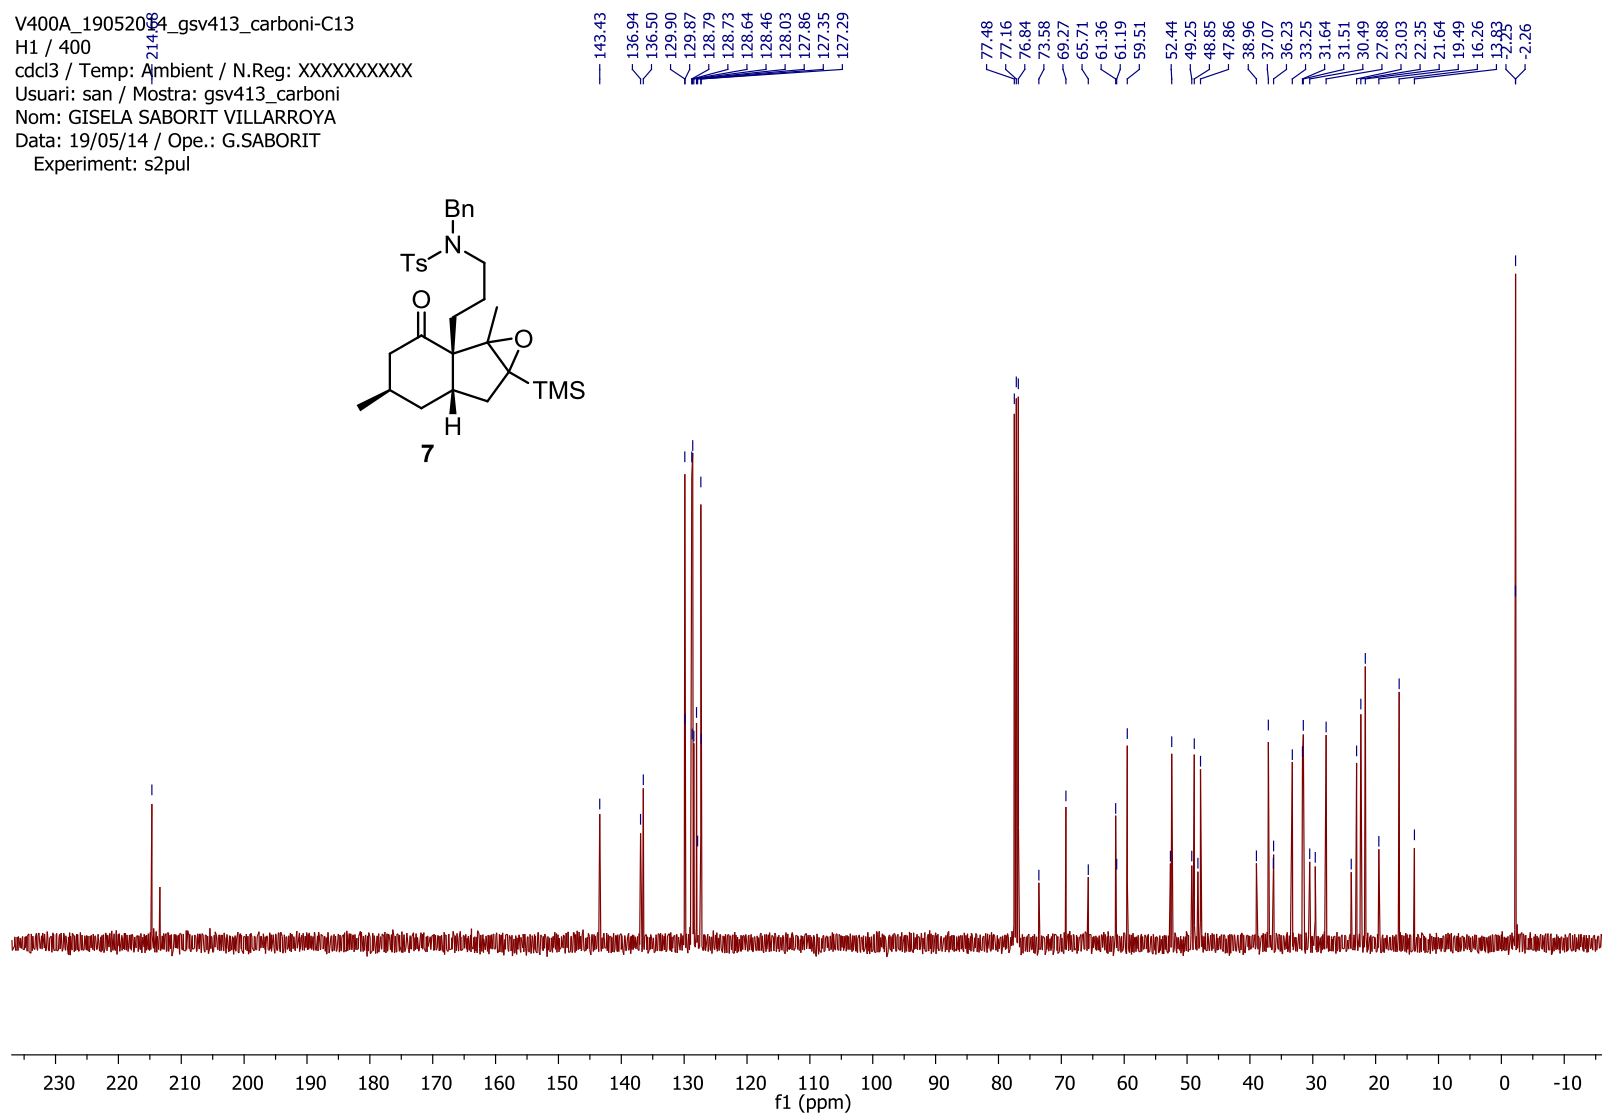

M400AFF\_22052014\_gsv413\_base-H1  
 Submitq / 400  
 cdcl3 / Temp: 25C / N.Reg: XXXXXXXXXX  
 Usuari: san / Mostra: gsv413\_base  
 Nom: GISELA SABORIT VILLARROYA  
 Data: 22/05/14 / Ope.: G.SABORIT

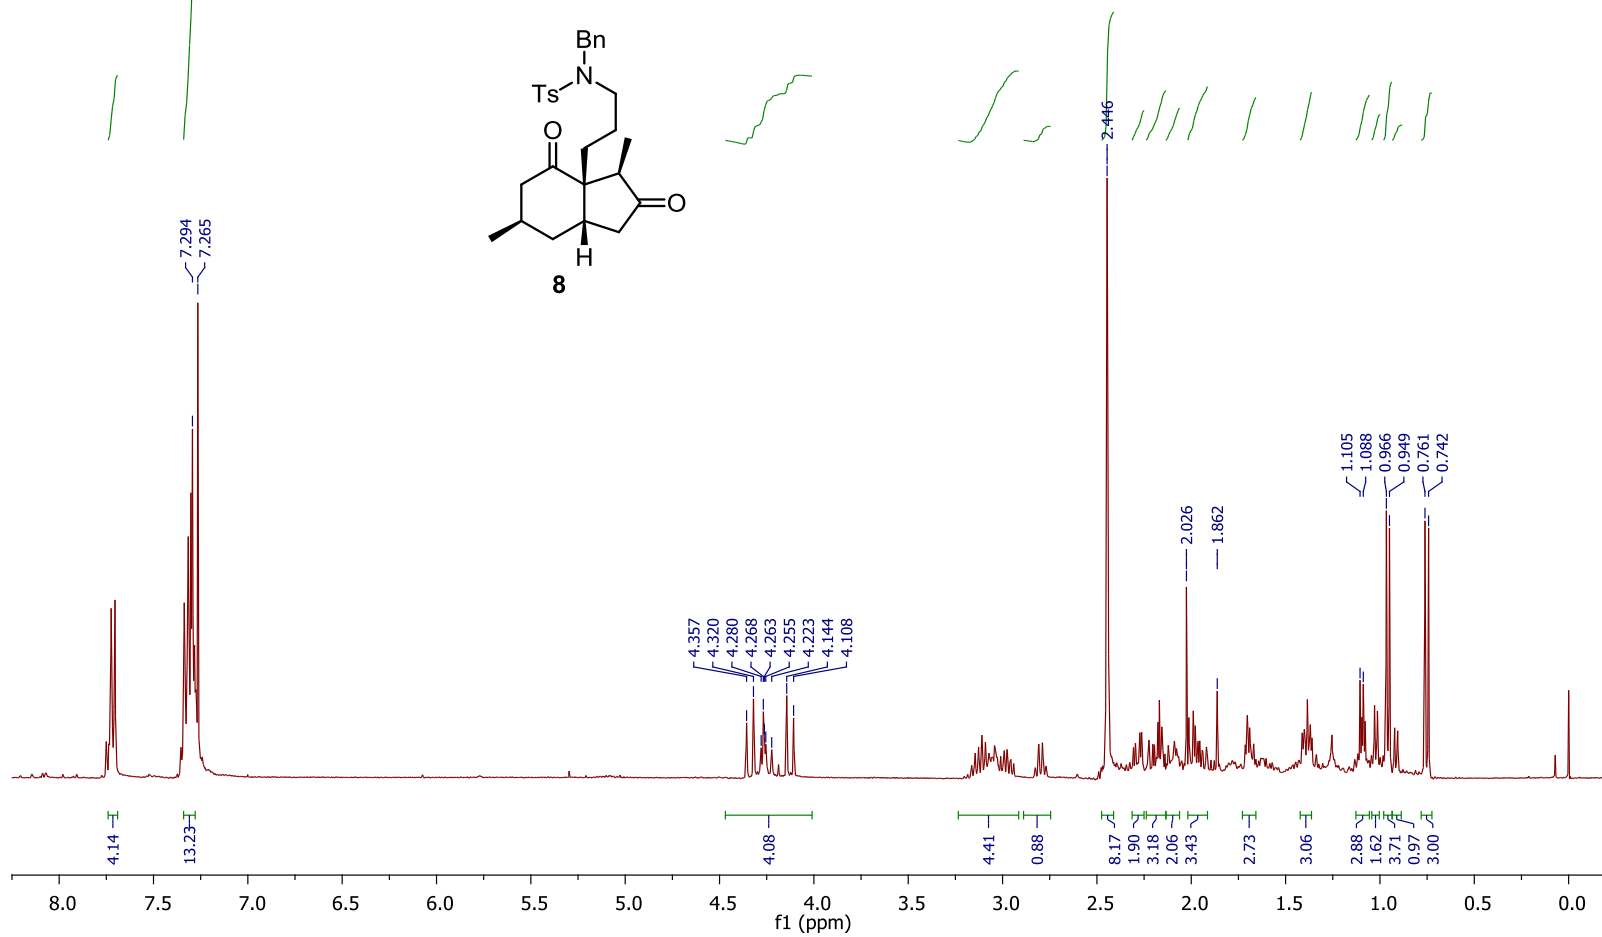

V400A\_21052014\_gsv413\_2\_3hcarboni-C13  
H1 / 400  
cdcl3 / Temp: Ambient / N.Reg: XXXXXXXXXX  
Usuari: san / Mostra: gsv413\_2\_3hcarboni  
Nom: GISELA SABORIT VILLARROYA  
Data: 21/05/14 / Ope.: G.SABORIT  
Experiment: s2pul

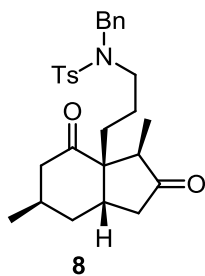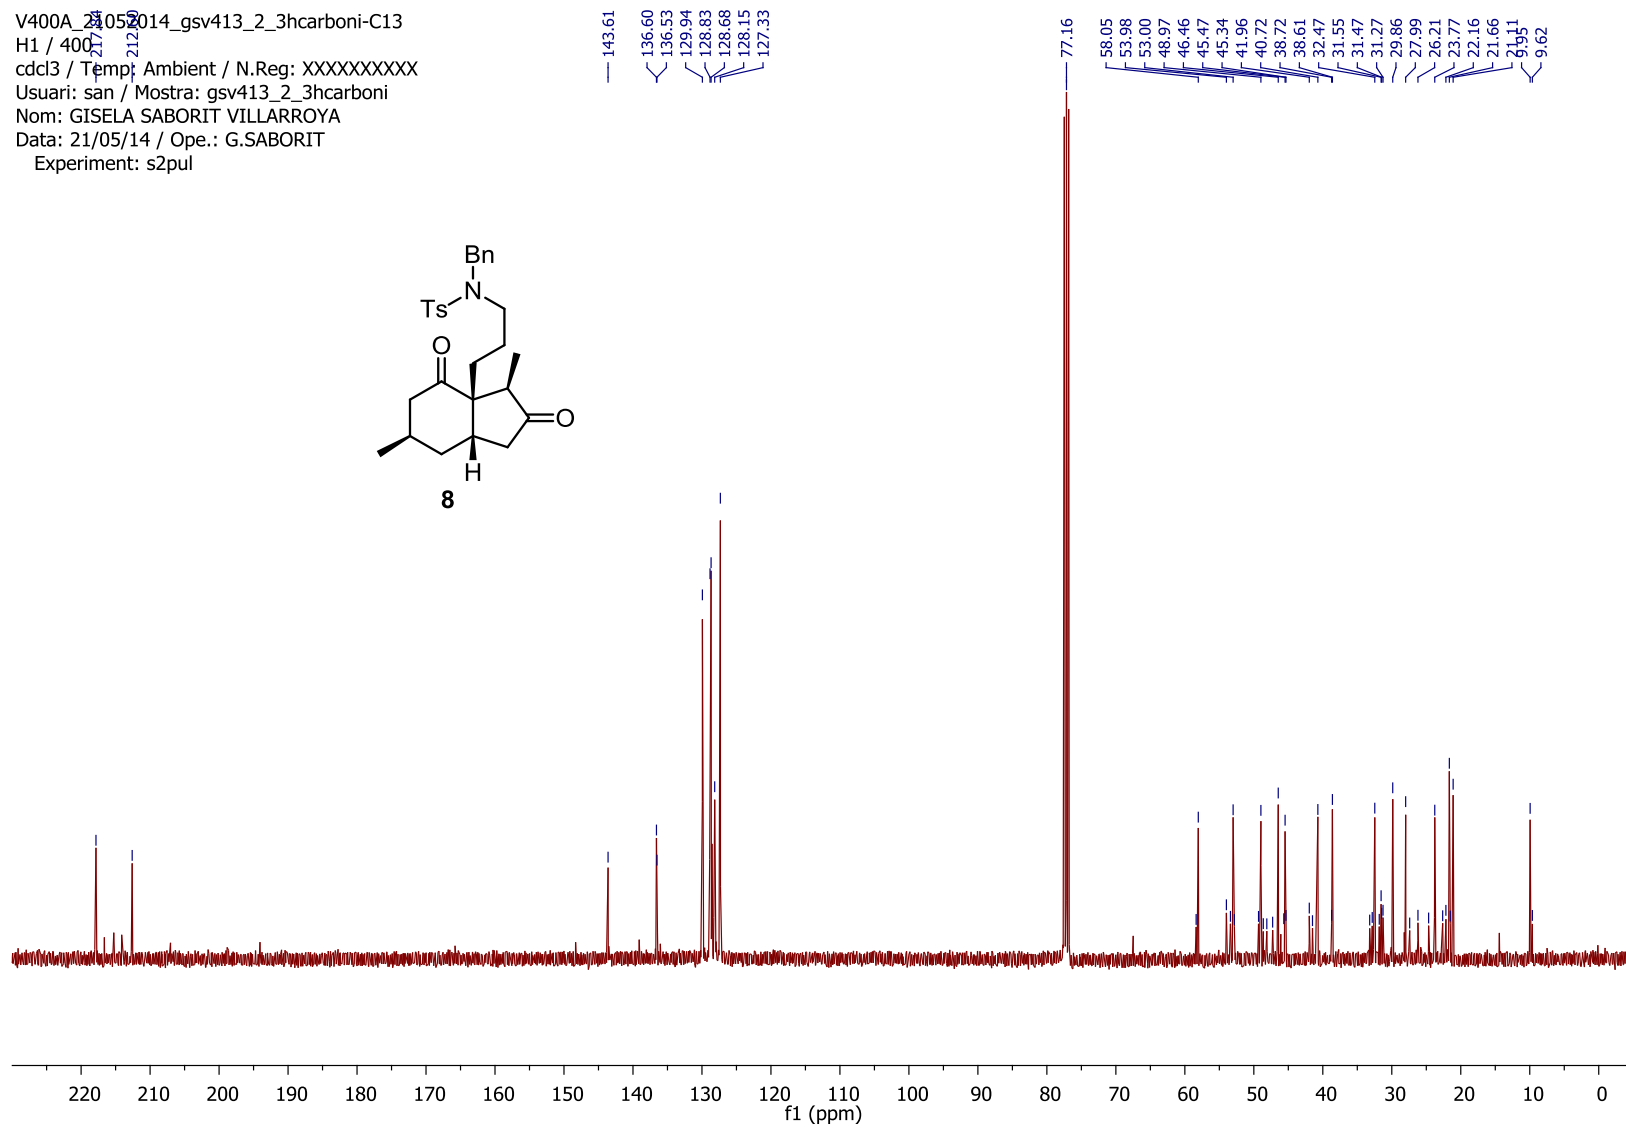

Supplement: Additional file 1 [file 1860-5397-14-237-S1.pdf]
